# Supplementary material for: Suberin isolation from cork using ionic liquids: characterisation of ensuing products
Source: Royal Society of Chemistry journal article supplement (doi:10.1039/c2nj40433h), 2012-01-01

## Electronic Supplementary Information

### Suberin isolation process from cork using ionic liquids: characterisation of ensuing products

Rui Ferreira,<sup>†,a</sup> Helga Garcia,<sup>†,a</sup> Andreia F. Sousa,<sup>b</sup> Marija Petkovic,<sup>a</sup> Pedro Lamosa,<sup>a</sup>  
Carmen Freire,<sup>b</sup> Armando J. D. Silvestre,<sup>b</sup> Luís Paulo N. Rebelo<sup>a</sup> and Cristina Silva  
Pereira<sup>a,c\*</sup>

<sup>a</sup>Instituto de Tecnologia Química e Biológica, Universidade Nova de Lisboa, Apartado 127, 2781-901, Oeiras, Portugal (URL: <http://www.itqb.unl.pt>)

<sup>b</sup>CICECO and Department of Chemistry, University of Aveiro, Campus de Santiago, 3810-193 Aveiro, Portugal

<sup>c</sup>Instituto de Biologia Experimental e Tecnológica (IBET), Apartado 12, 2781-901 Oeiras, Portugal

<sup>†</sup>Equally contributing authors; <sup>\*</sup>corresponding author: [spereira@itqb.unl.pt](mailto:spereira@itqb.unl.pt)

**ESI 1.** ATR-FTIR spectrum and assignment of cork major compounds (control)<sup>[4b, 4c, 7b, 26]</sup>, treated under the extracted conditions (4 h at 100 °C) in the absence of ionic liquid. The underlined cork constituent represents the major contribution to the infrared band.

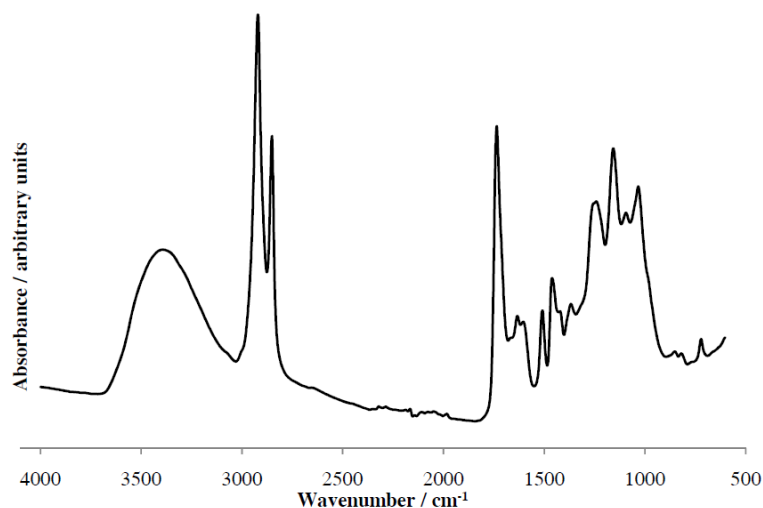

| Wavenumber / cm <sup>-1</sup> | Description                                                                | Assignment                                            |
|-------------------------------|----------------------------------------------------------------------------|-------------------------------------------------------|
| 3395                          | OH stretch                                                                 | water and polissacharides                             |
| 2921                          | CH aliph. stretch                                                          | <u>suberin</u> , polissacharides and lignin           |
| 2852                          | CH aliph. stretch                                                          | <u>suberin</u> , polissacharides and lignin           |
| 1737                          | C=O stretch (ester groups)                                                 | <u>suberin</u> , polissacharides and lignin           |
| 1635                          | C=C stretch                                                                | suberin                                               |
| 1606                          | C=C stretch                                                                | suberin and aromatic lignin                           |
| 1511                          | C=C stretch                                                                | aromatic <u>lignin</u> (Guaiacyl-type)                |
| 1460                          | CH asym. deformation                                                       | suberin, polissacharides and lignin                   |
| 1424                          | C-C stretch in the ring                                                    | small amount of aromatic ring<br>Guaiacyl-type lignin |
| 1366                          | CH sym. deformation                                                        | suberin, polissacharides and lignin                   |
| 1242                          | CO stretch                                                                 | <u>suberin</u> , polissacharides and lignin           |
| 1158                          | CO asym. stretch                                                           | <u>suberin</u> , polissacharides and lignin           |
| 1092                          | CH, CO deformation                                                         | <u>polissacharides</u> and lignin                     |
| 1034                          | CH, CO deformation                                                         | <u>polissacharides</u> and lignin                     |
| 855                           | CH out-of-plane deformation                                                | aromatic ring Guaiacyl-type <u>lignin</u>             |
| 819                           | CH out-of-plane bending                                                    | aromatic ring Guaiacyl-type <u>lignin</u>             |
| 724                           | CH out-of-plane deformation<br>(R <sub>1</sub> CH=CHR <sub>2</sub> groups) | <u>suberin</u>                                        |

**ESI 2.** NMR spectra (800 MHz, 25 °C) of the suberinic material fraction soluble in deuterated trichloromethane: a)  $^{13}\text{C}$  NMR, b) COSY, c) HSQC and d) HMBC.

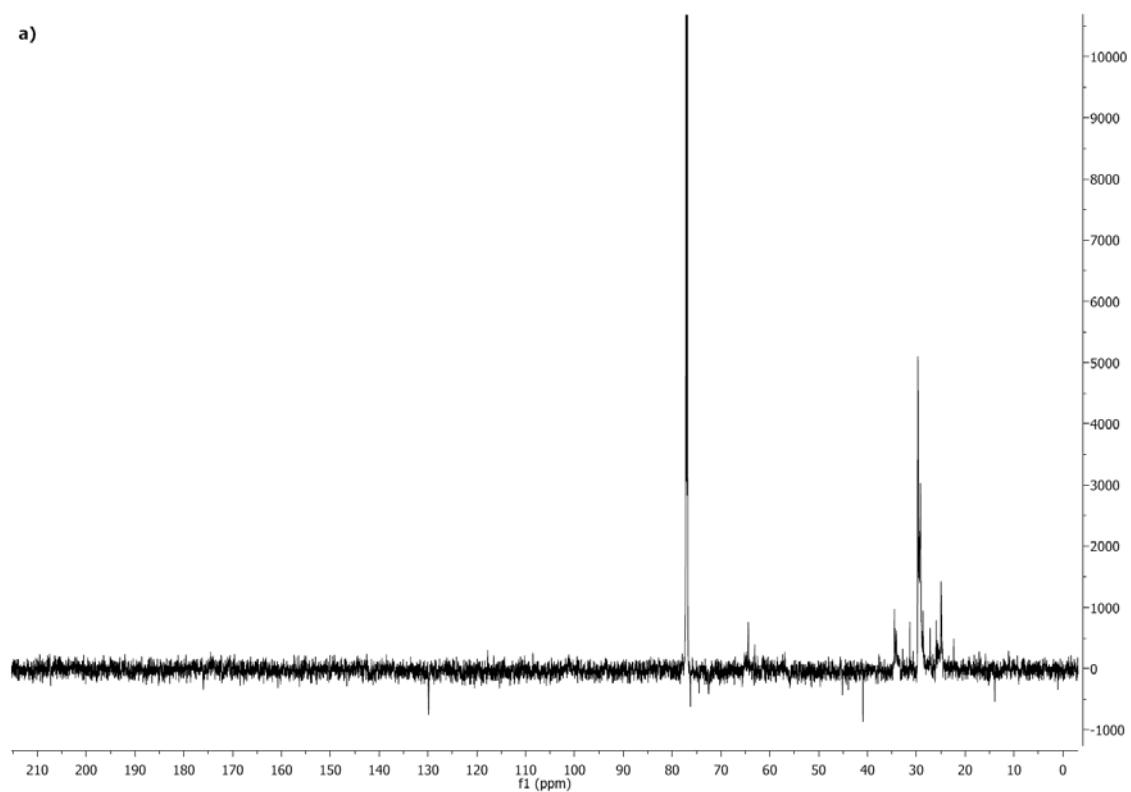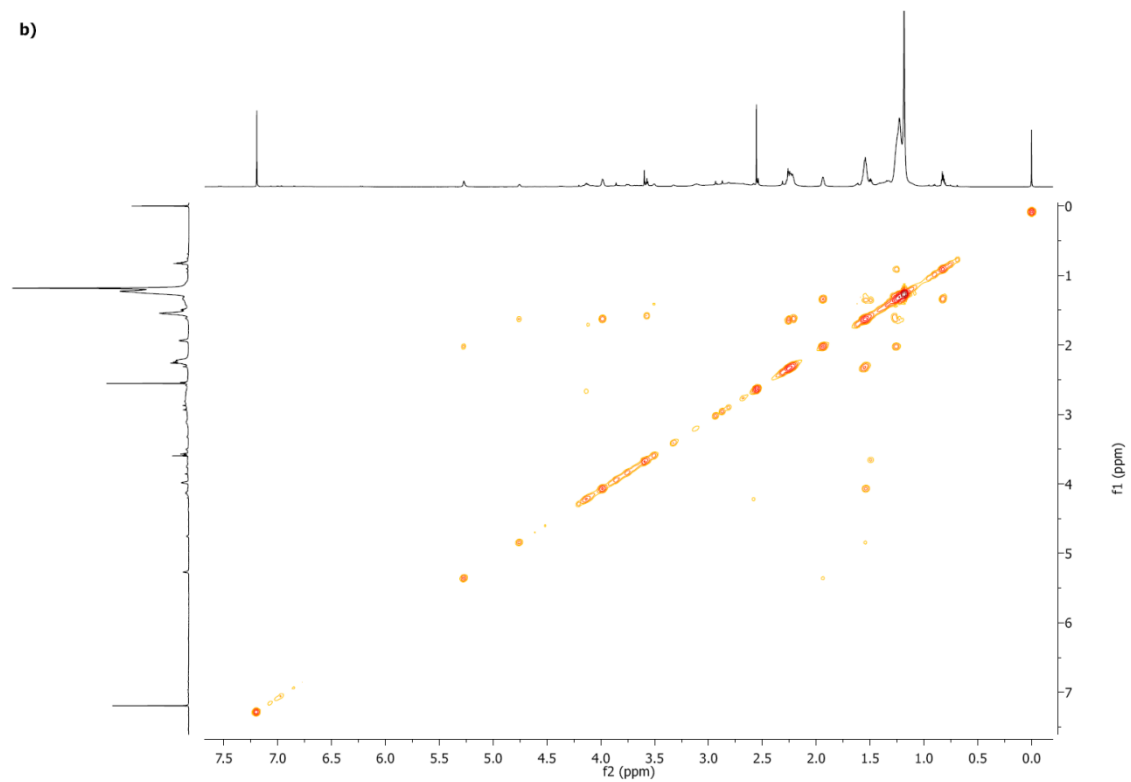

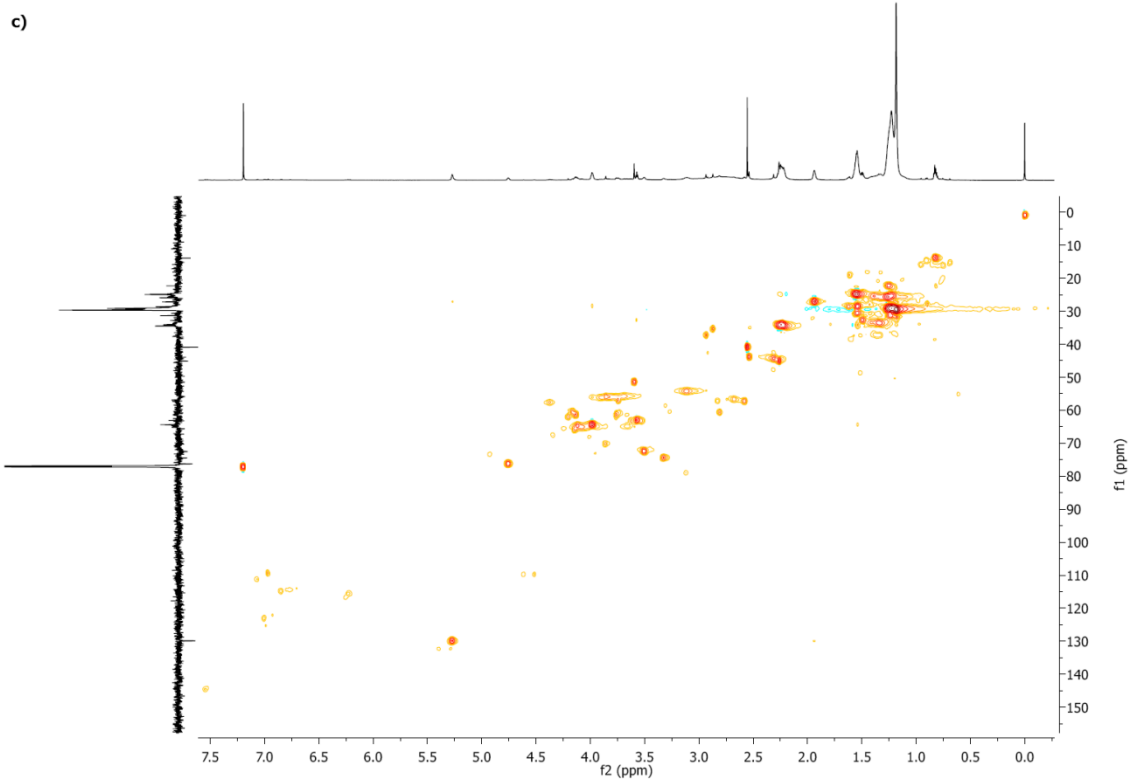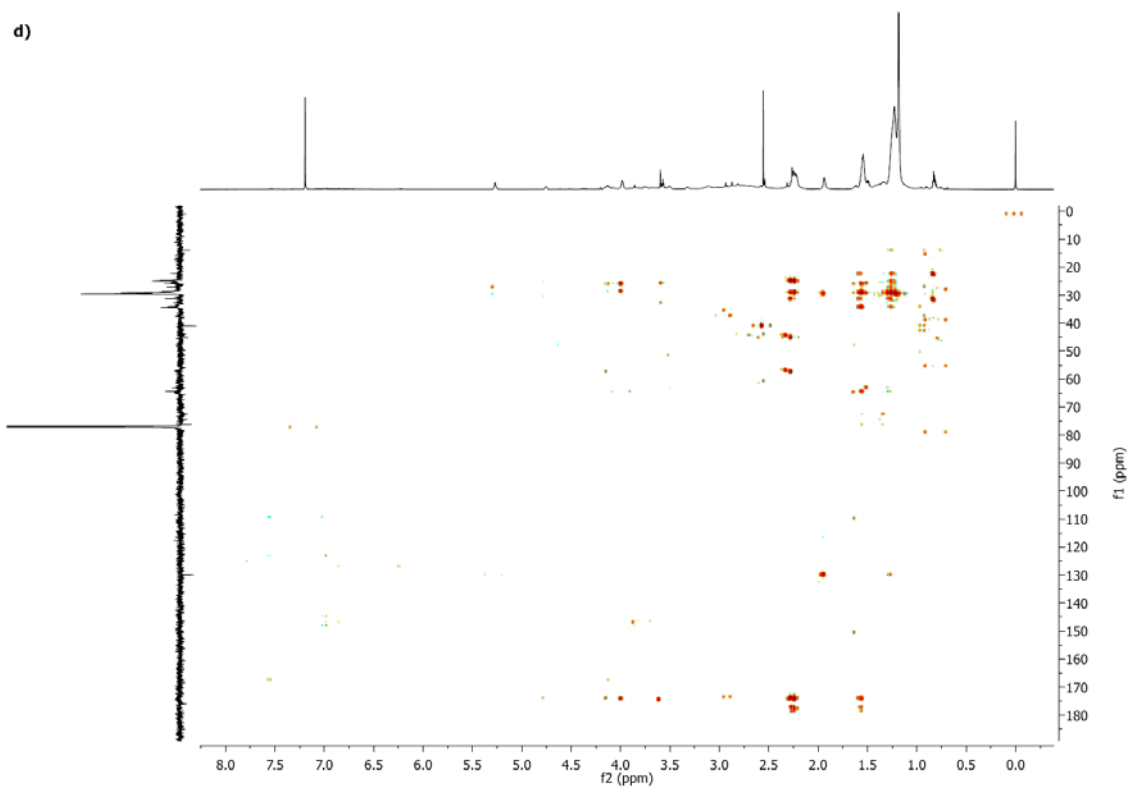

Supplement: c2nj40433h.pdf [file c2nj40433h.pdf]
